# Supplementary material for: Synthesis of mono/dinuclear rhenium(i) tricarbonyl substituted with 4-mercaptopyridine related ligands: spectral and theoretical evidence of thiolate/thione interconversion
Source: Royal Society of Chemistry journal article supplement (doi:10.1039/d0nj02328k), 2020-01-01
Supplement: d0nj02328k1.pdf [file d0nj02328k1.pdf]

### Supporting Information:

#### Synthesis of mono/binuclear rhenium(I) tricarbonyl substituted with 4-mercaptopyridine related ligands: Spectral and theoretical evidence of thiolate/thione interconversion.

Alejandra Gómez,<sup>a\*</sup> Geraldine Jara,<sup>a</sup> Erick Flores,<sup>a</sup> Tamara Maldonado,<sup>a</sup> Fernando Godoy,<sup>a</sup> Michelle Muñoz,<sup>a</sup> Andrés Vega,<sup>b</sup> Raul Mera,<sup>c</sup> Carlos P. Silva,<sup>a</sup> Jorge Pavez.<sup>a</sup>

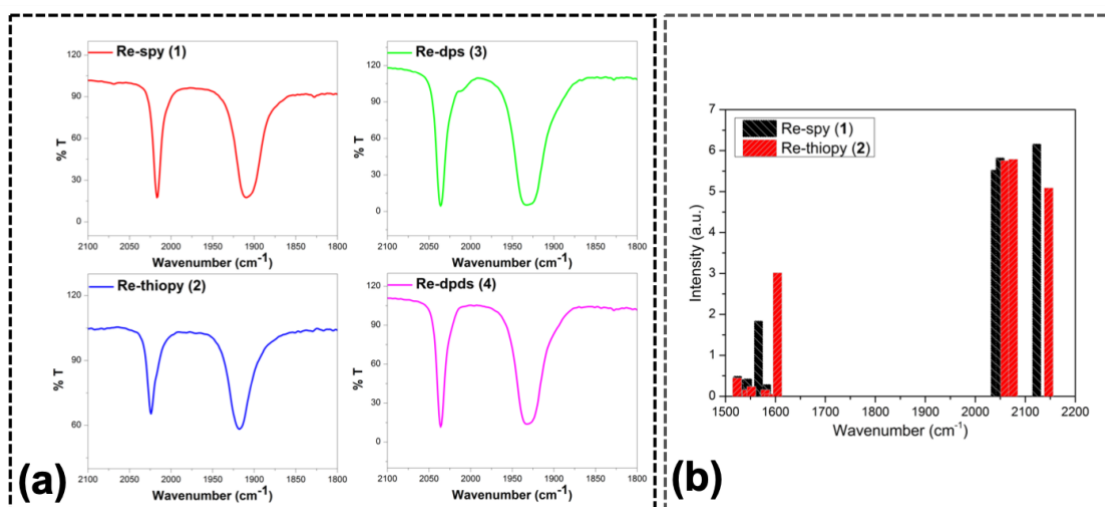

**Figure S1.** a) Infrared spectra measured in CH<sub>3</sub>CN for monometallic **1-2** and binuclear **3-4** complexes. b) IR spectra calculated for Re-spy (**1**) and Re-thiopy (**2**) in gas phase ( $\nu_{M-CO}$ : 2200-2000 cm<sup>-1</sup>). The frequencies for the estimation of IR absorptions were derived from Hessian matrices, obtained numerically for both systems (**1** and **2**) in gas phase at the GFN-xTB level of theory, on geometries previously optimized at the same level.

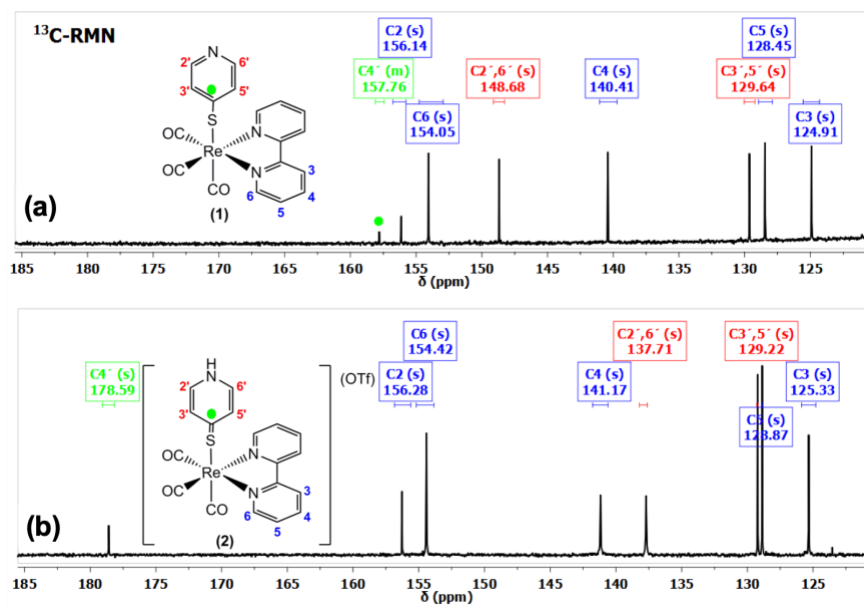

**Figure S2.**  $^{13}\text{C}\{^1\text{H}\}$  NMR spectrum of (a) **1** and (b) **2** in  $\text{CH}_3\text{CN}-d_3$  (400 MHz).

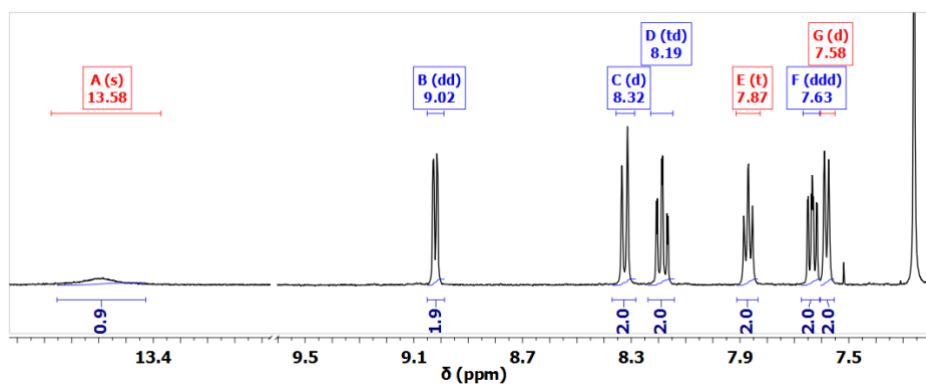

**Figure S3.**  $^1\text{H}$  NMR spectrum of **2** in  $\text{CHCl}_3-d_1$  (400 MHz).

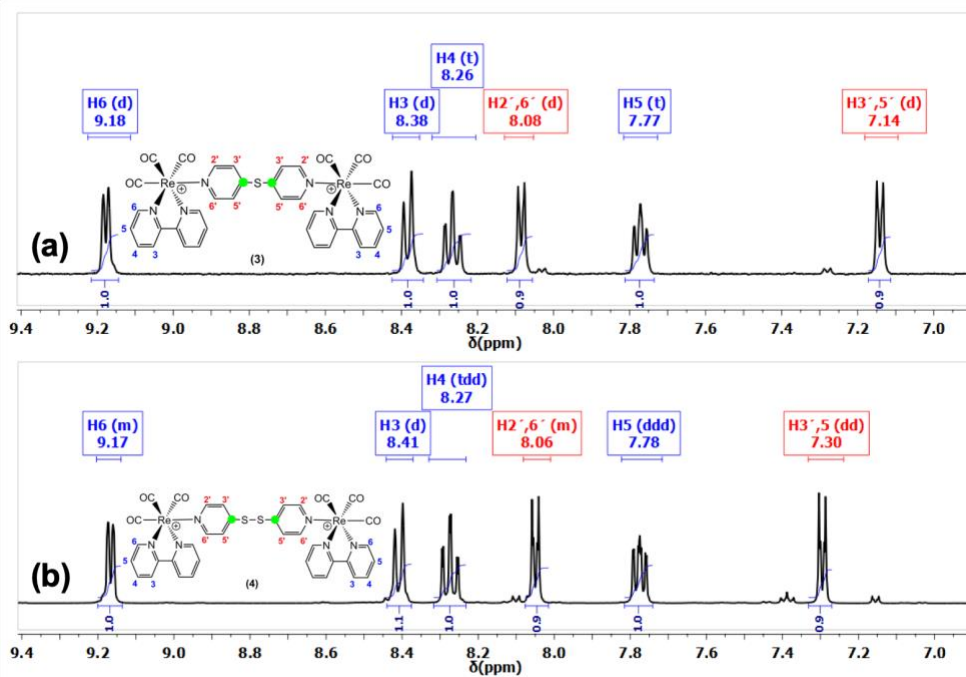

Figure S4.  $^1\text{H}$  NMR spectrum of (a) **3** and (b) **4** in  $\text{CH}_3\text{CN-d}_3$  (400 MHz).

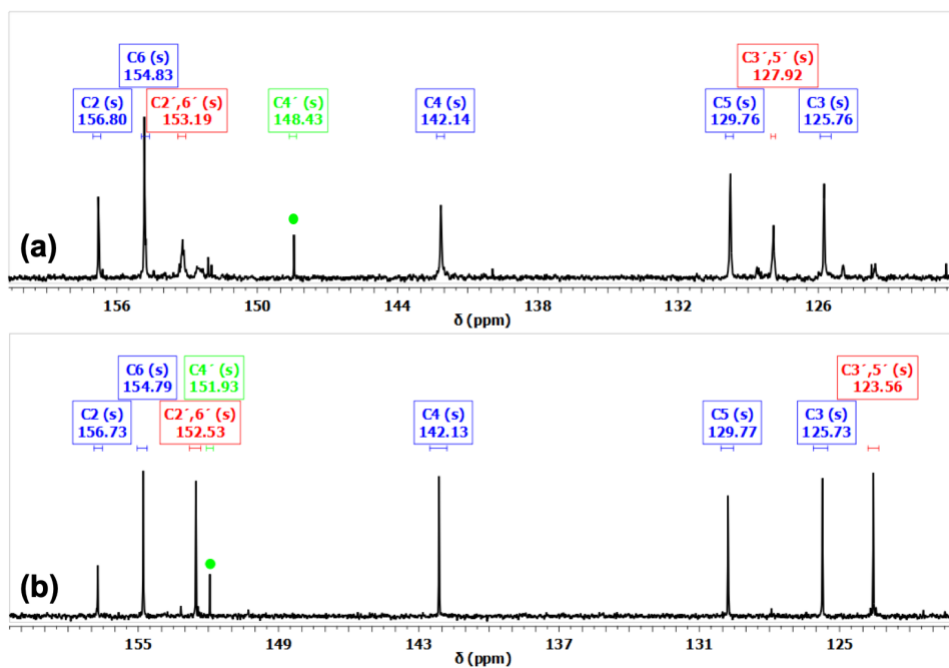

Figure S5.  $^{13}\text{C}\{^1\text{H}\}$  NMR spectrum of (a) **3** and (b) **4** in  $\text{CH}_3\text{CN-d}_3$  (400 MHz).

**Table S1.** Crystal data and structure refinement for  $[(\text{CO})_3(\text{bpy})\text{Re}(\mu\text{-N,N}'\text{-NC}_5\text{H}_4\text{SC}_5\text{H}_4\text{N})\text{Re}(\text{bpy})(\text{CO})_3](\text{CF}_3\text{SO}_3)_2$  [+solvent].

|                                                                             |                                                                      |
|-----------------------------------------------------------------------------|----------------------------------------------------------------------|
| <b>FW/uma</b>                                                               | 1339.23                                                              |
| <b>Crystal System</b>                                                       | Triclinic                                                            |
| <b>Space Group</b>                                                          | $P\bar{1}$                                                           |
| <b>a (Å)</b>                                                                | 10.865(4)                                                            |
| <b>b (Å)</b>                                                                | 14.038(5)                                                            |
| <b>c (Å)</b>                                                                | 16.021(6)                                                            |
| <b><math>\alpha</math> (°)</b>                                              | 82.680(6)                                                            |
| <b><math>\beta</math> (°)</b>                                               | 72.674(6)                                                            |
| <b><math>\gamma</math> (°)</b>                                              | 89.860(7)                                                            |
| <b>V (Å<sup>3</sup>)</b>                                                    | 2312.0(14)                                                           |
| <b>Z</b>                                                                    | 2                                                                    |
| <b>d (g cm<sup>-3</sup>)</b>                                                | 1.924                                                                |
| <b><math>\mu</math> (mm<sup>-1</sup>)</b>                                   | 5.46                                                                 |
| <b>F000</b>                                                                 | 1326                                                                 |
| <b><math>\theta</math> range</b>                                            | 2.0 to 26.0°                                                         |
| <b>hkl range</b>                                                            | $-13 \leq h \leq 13$<br>$-17 \leq k \leq 17$<br>$-19 \leq l \leq 19$ |
| <b>N<sub>tot</sub>, N<sub>uniq</sub> (R<sub>int</sub>), N<sub>obs</sub></b> | 18110, 9075, 0.036, 7515                                             |
| <b>Refinement Parameters</b>                                                | 676                                                                  |
| <b>GOF</b>                                                                  | 1.02                                                                 |
| <b>R1, wR2 (obs)</b>                                                        | 0.038, 0.103                                                         |
| <b>R1, wR2 (all)</b>                                                        |                                                                      |
| <b>Max. and min <math>\Delta\rho</math></b>                                 | 2.19 and -2.33                                                       |

**Table S2.** Selected bond and interatomic distances and angles for  $[(\text{CO})_3(\text{bpy})\text{Re}(\mu\text{-N,N}'\text{-NC}_5\text{H}_4\text{SC}_5\text{H}_4\text{N})\text{Re}(\text{bpy})(\text{CO})_3](\text{CF}_3\text{SO}_3)_2$  [+solvent].

|             |           |             |           |
|-------------|-----------|-------------|-----------|
| Re1—C32     | 1.919(7)  | Re2—C36     | 1.921(7)  |
| Re1—C31     | 1.923(7)  | Re2—C35     | 1.925(7)  |
| Re1—C33     | 1.925(7)  | Re2—C34     | 1.921(7)  |
| Re1—N1      | 2.190(5)  | Re2—N4      | 2.166(5)  |
| Re1—N2      | 2.188(5)  | Re2—N3      | 2.183(5)  |
| Re1—N5      | 2.208(5)  | Re2—N6      | 2.205(5)  |
| Re1...Re2   | 11.334(3) |             |           |
| C32—Re1—C31 | 85.3(3)   | C36—Re2—C35 | 86.7(3)   |
| C32—Re1—C33 | 87.6(3)   | C36—Re2—C34 | 87.6(3)   |
| C31—Re1—C33 | 89.3(3)   | C35—Re2—C34 | 89.7(3)   |
| C32—Re1—N1  | 101.8(2)  | C36—Re2—N4  | 173.6(3)  |
| C31—Re1—N1  | 172.5(2)  | C35—Re2—N4  | 99.5(3)   |
| C33—Re1—N1  | 93.3(3)   | C34—Re2—N4  | 93.9(3)   |
| C32—Re1—N2  | 176.2(2)  | C36—Re2—N3  | 98.9(3)   |
| C31—Re1—N2  | 98.2(2)   | C35—Re2—N3  | 174.1(2)  |
| C33—Re1—N2  | 90.9(3)   | C34—Re2—N3  | 92.1(2)   |
| N1—Re1—N2   | 74.8(2)   | N4—Re2—N3   | 74.8(2)   |
| C32—Re1—N5  | 93.4(2)   | C36—Re2—N6  | 93.3(2)   |
| C31—Re1—N5  | 91.1(3)   | C35—Re2—N6  | 92.6(2)   |
| C33—Re1—N5  | 178.9(3)  | C34—Re2—N6  | 177.6(2)  |
| N1—Re1—N5   | 86.15(19) | N4—Re2—N6   | 84.95(18) |
| N2—Re1—N5   | 88.01(18) | N3—Re2—N6   | 85.54(18) |
| C23—S1—C28  | 103.3(3)  |             |           |

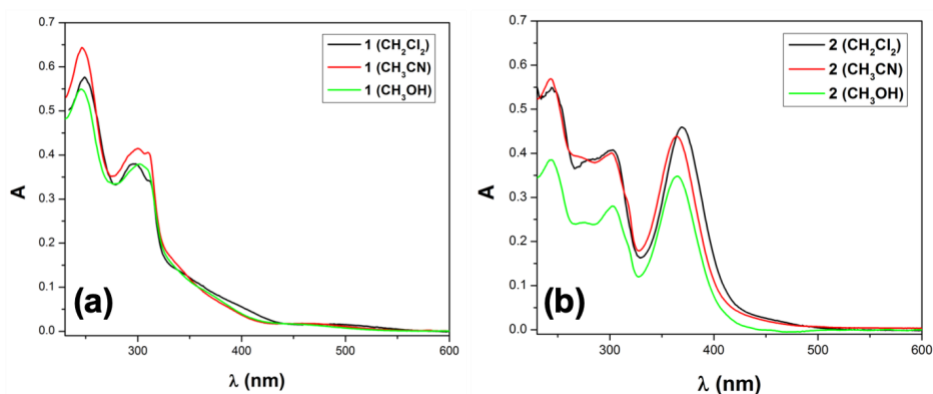

**Figure S6.** UV-Vis spectrum of (a) **1** and (b) **2** measured in  $\text{CH}_2\text{Cl}_2$ ,  $\text{CH}_3\text{CN}$ ,  $\text{CH}_3\text{OH}$ .

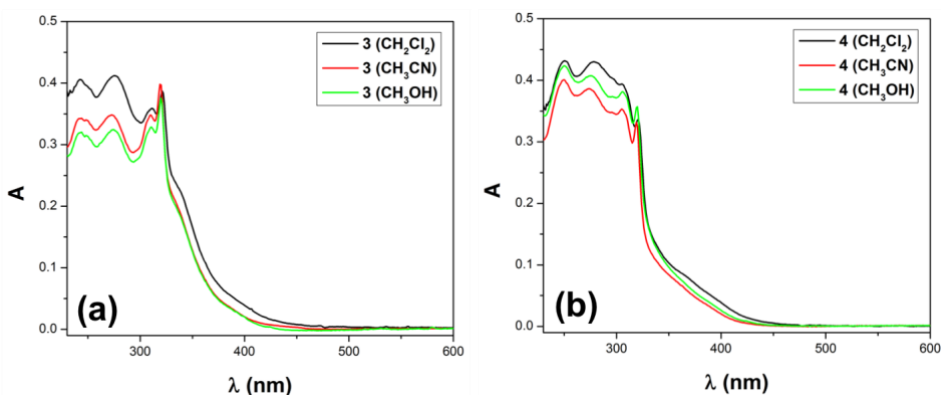

**Figure S7.** UV-Vis spectrum of (a) **3** and (b) **4** measured in  $\text{CH}_2\text{Cl}_2$ ,  $\text{CH}_3\text{CN}$ ,  $\text{CH}_3\text{OH}$ .

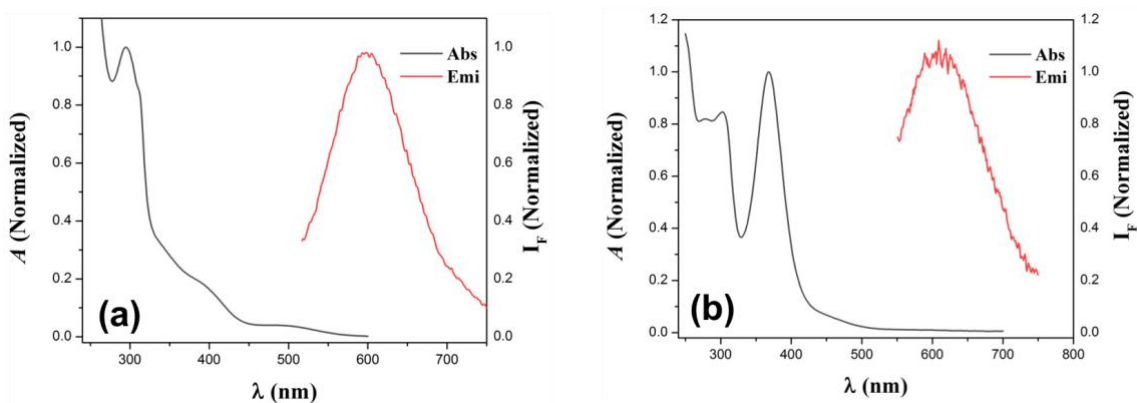

**Figure S8.** Electronic absorption (black trace) and emission (red trace) of (a) **1** and (b) **2** ( $\lambda_{\text{exc}}$ : 435 nm) measured in aerated  $\text{CH}_2\text{Cl}_2$  at room temperature.

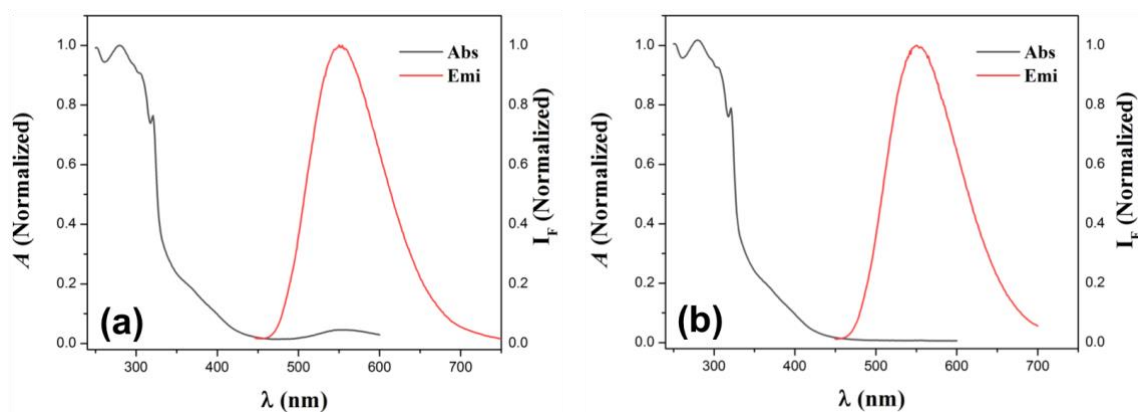

**Figure S9.** Electronic absorption (black trace) and emission (red trace) of (a) **3** and (b) **4** ( $\lambda_{\text{exc}}$ : 425 nm) measured in aerated  $\text{CH}_2\text{Cl}_2$  at room temperature.

**Quantum yields ( $\Phi_F$ )** were determined using the follow expression:

$$\Phi_x = \Phi_{st} \left( \frac{\text{Grad}_x}{\text{Grad}_{st}} \right) \left( \frac{\eta_x^2}{\eta_{st}^2} \right)$$

Where:

$\Phi_x$ : Quantum yield of the sample.

$\Phi_{st}$ : Quantum yield of the standard.

$\eta_x$ : Refraction index of the solvent used for measuring the sample.

$\eta_{st}$ : Refraction index of the solvent used for measuring the standard.

$\text{Grad}_x$ ;  $\text{Grad}_{st}$ : Slopes obtained in of the plot of integrated fluorescence intensity versus the absorbance at the excitation wavelength of the standard and the sample, respectively.

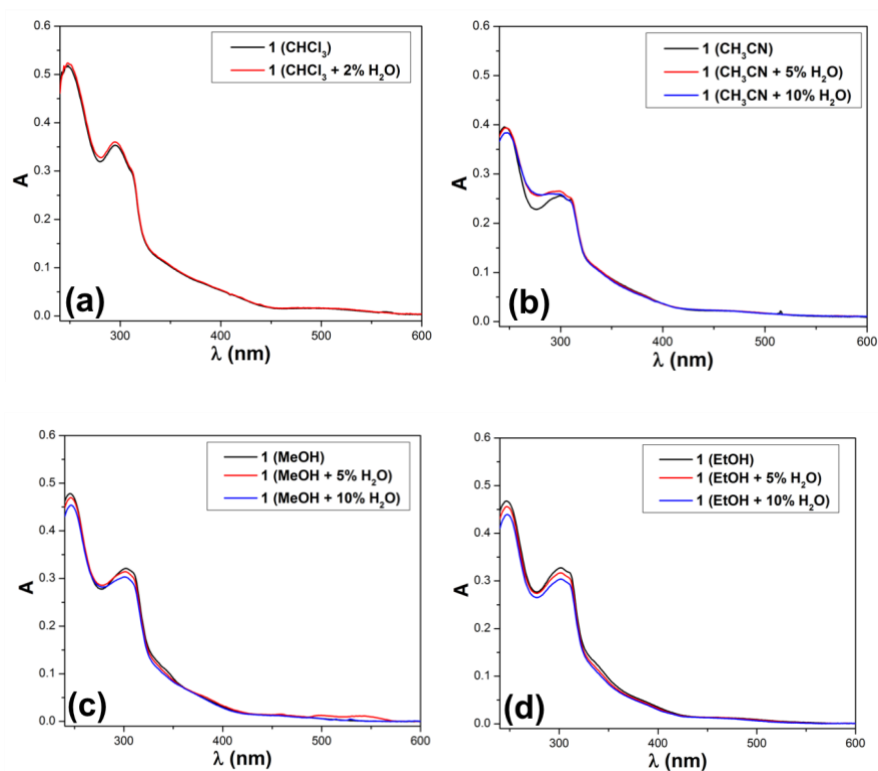

**Figure S10.** UV-Vis spectrum of **1** measured in different solvents as  $\text{CHCl}_3$ ,  $\text{CH}_3\text{CN}$ ,  $\text{CH}_3\text{OH}$ ,  $\text{EtOH}$  and respective addition of water.

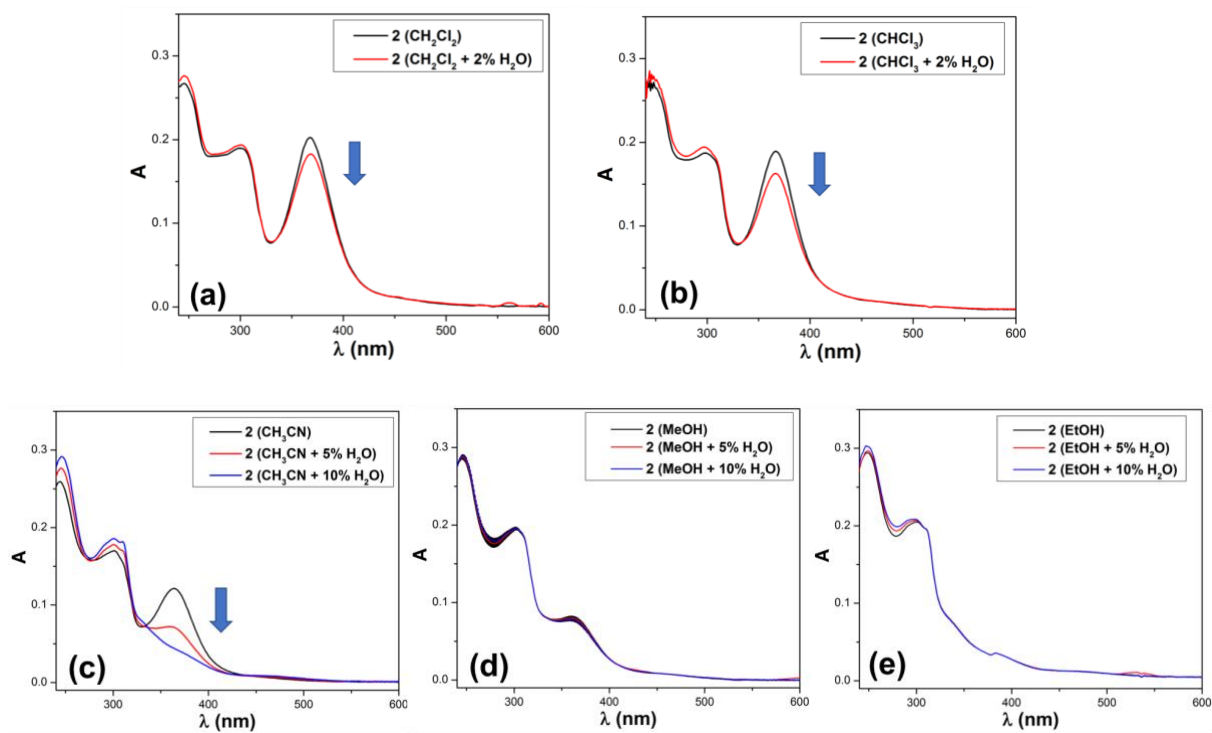

**Figure S11.** UV-Vis spectrum of **2** measured in different solvents as  $\text{CH}_2\text{Cl}_2$ ,  $\text{CHCl}_3$ ,  $\text{CH}_3\text{CN}$ ,  $\text{CH}_3\text{OH}$ ,  $\text{EtOH}$  and respective addition of water.

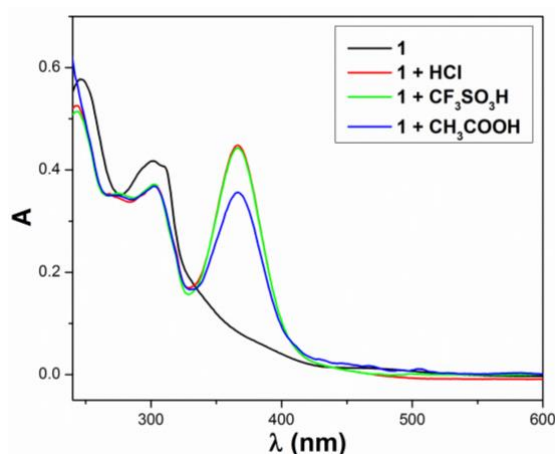

**Figure S12.** UV-Vis spectrum of **1** measured in EtOH after the addition of acids such as HCl, CH<sub>3</sub>COOH, HSO<sub>3</sub>CF<sub>3</sub>.

**Theoretical calculations. Solvated structures.** The optimized structure for **1** was placed at the center of a sphere containing 130 methanol molecules by using Packmol [1]. One water molecule was placed close to the solute to mimic the experimental conditions. A 6 ps full quantum-chemical, with the GFN2-xTB semiempirical method[2], Langevin molecular dynamics simulation in spherical-boundary conditions at 298 K, was performed on the system, after a 300-steps equilibration. The system was then subject to 2610 optimization steps at the same level. Both the MD and the optimization calculations employed a generalized Born-based continuum model solvent with the methanol parameters included in the program. All semiempirical calculations were performed with the xtb program v6.2 (<https://github.com/grimmlab/xtb>), while the molecular dynamic and optimization steps were guided by the pDynamo libraries v1.9.0[3]. The solute and two solvent molecules, judged important for the studied effect, were separated from the final structure and employed for UV-vis spectra calculation without further optimization, in order to avoid disrupting the solvated geometry.

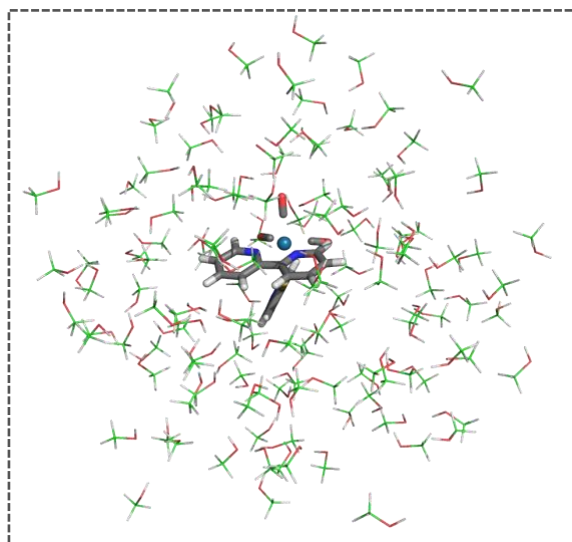

**Figure S13.** Visualization of the full system: Re-spy with a sphere of 130 methanol molecules, and one water molecule.



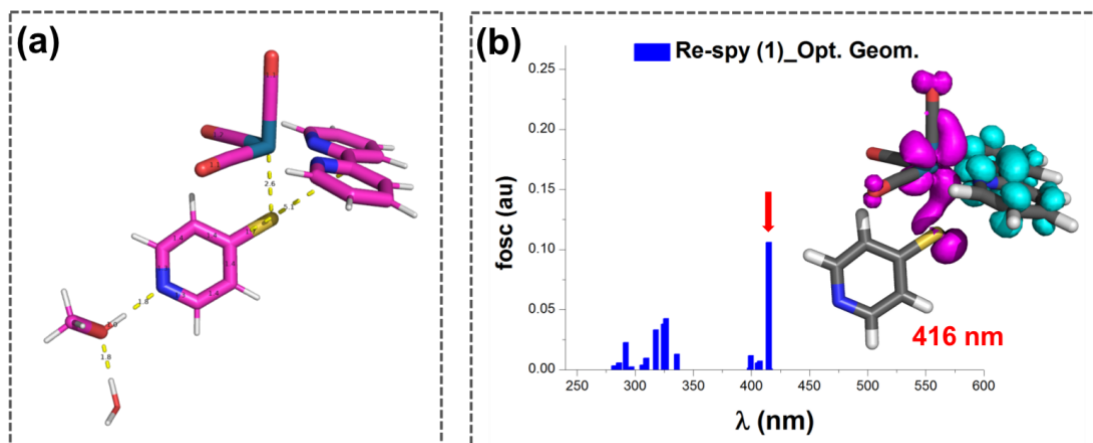

**Figure S14.** Re-spy (1)..MeOH..H<sub>2</sub>O **a)** Structure of solvated geometry. **b)** Simulated electronic spectra for optimized geometry after and electronic density difference analysis surfaces.

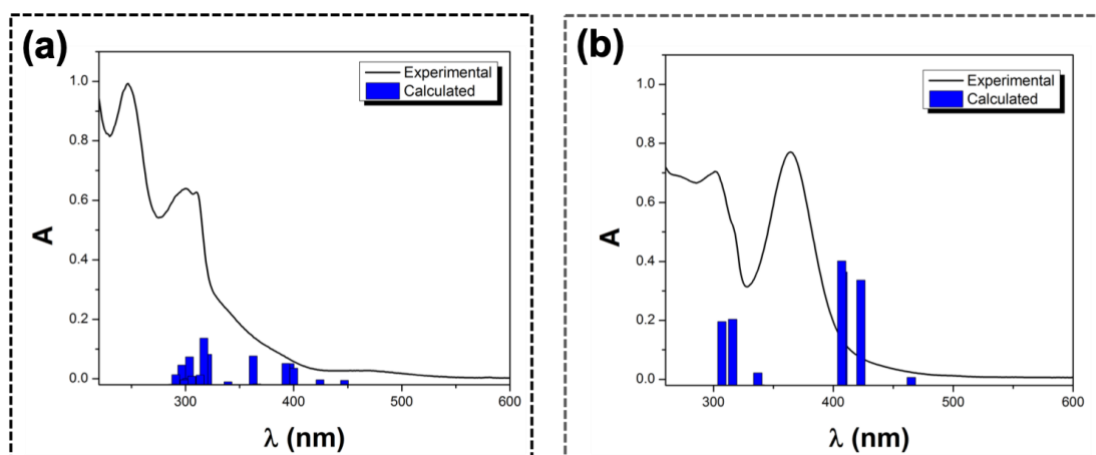

**Figure S15.** ADC(2) ab-initio level calculations for **a)** Re-spy (1) and **b)** Re-thiopy (2).

**Table S3.** Summary of Electrochemical Data for the redox behavior of rhenium(I) tricarbonyl complexes

| Complex                     | $E_{1/2}$ | $E_{pc}$ (I) | $E_{pa}$ (I') | $E_{pc}$ (II) | $E_{pa}$ (II') | $E_{pc}$ (III) | $E_{pa}$ (III') |
|-----------------------------|-----------|--------------|---------------|---------------|----------------|----------------|-----------------|
|                             | (I/I') /V | /V           | /V            | /V            | /V             | /V             | /V              |
| Re-spy (1)                  | -1.681    | -1.727       | -1.635        | -2.119        | -1.495         | --             | --              |
| Re-thiopy (2)               | -1.689    | -1.742       | -1.636        | -2.089        | -1.516         | --             | --              |
| Re-dps (3)                  | -1.533    | -1.581       | -1.485        | -2.049        | -1.636         | -1.032         | -0.060          |
| Re-dpds (4)                 | -1.509    | -1.557       | -1.461        | -2.060        | -1.627         | -1.152         | 0.094           |
| (bpy)Re(CO) <sub>3</sub> Cl | -1.670    | -1.710       | -1.620        | -2.110        | -1.540         | --             | --              |

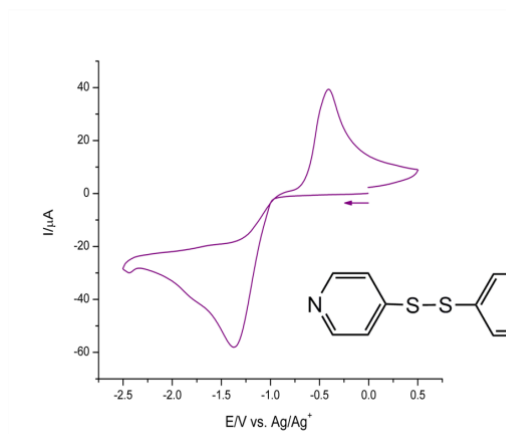

**Figure S16.** Cyclic voltammogram of 4,4'-dipyridyldisulfide (dpds); scan rate: 0.5 V/s. (dpds) in dry CH<sub>3</sub>CN.

#### References

- [1] L. Martínez, R. Andrade, E. G. Birgin, J. M. Martínez, *J. Comput. Chem.* 2009, **30**, 2157–2164.
- [2] C. Bannwarth, S. Ehlert, S. Grimme, S., *J. Chem. Theory Comput.* 2019, **15**, 1652–1671.
- [3] M. J. Field, *J. Chem. Theory Comput.* 2008, **4**, 1151–1161.
